15 ABSTRACT

16

17 **Background:** External loading of the ligamentous tissues induces mechanical creep, which  
18 modifies neuromuscular response to perturbations. It is not well understood how ligamentous  
19 creep affects athletic performance and contributes to modifications of knee biomechanics during  
20 functional tasks.

21 **Hypothesis/Purpose:** The purpose of this study was to examine the mechanical and  
22 neuromuscular responses to single leg drop landing perturbations before and after passive  
23 loading of the knee joint.

24 **Study Design:** Descriptive laboratory study

25 **Methods:** Male (n=7) and female (n=14) participants' ( $21.3 \pm 2.1$  yrs,  $1.69 \pm 0.09$  m,  $69.3 \pm 13.0$   
26 kg) right hip, knee, and ankle kinematics were assessed during drop landings performed from a  
27 30 cm height onto a force platform before and after a 10 min creep protocol. Electromyography  
28 (EMG) signals were recorded from rectus femoris (RF), vastus lateralis (VL), vastus medialis  
29 (VM), semimembranosus (SM), and biceps femoris (BF) muscles. The creep protocol involved  
30 fixing the knee joint at  $35^\circ$  during static loading with perpendicular loads of either 200 N (males)  
31 or 150 N (females). Maximum, minimum, range of motion (ROM), and angular velocities were  
32 assessed for the hip, knee, and ankle joints, while normalized average EMG (NAEMG), average  
33 vertical ground reaction forces (aVGRF), and rate of force development (RFD) were assessed at  
34 landing. Rate of force development (RFD) was calculated during the landings using ANOVAs.  
35 Alpha was set at 0.05.

36 **Results:** Maximum hip flexion velocity decreased ( $p < 0.01$ ). Minimum knee flexion velocity  
37 increased ( $p < 0.02$ ). Minimum knee ad/abduction velocity decreased ( $p < 0.001$ ). Ankle ROM  
38 decreased ( $p < 0.001$ ). aVGRF decreased ( $p < 0.02$ ). RFD had a non-significant trend ( $p =$   
39  $0.076$ ). NAEMG was significant between muscle groups ( $p < 0.02$ ).

40 **Conclusion:** Distinct changes in velocity parameters are attributed to the altered mechanical  
41 behavior of the knee joint tissues and may contribute to changes in the loading of the leg during  
42 landing.

43

## 44 INTRODUCTION

45           Knee joint injuries greatly affect athletic and recreational sport populations. Sex-related  
46 and sports based factors are the leading determinants of knee injuries [17,21,32,37]. The loading  
47 of the knee joint in dynamic sporting activities influences the stresses and strains which the  
48 tissues within and surrounding the knee joint capsule tolerate. The ligaments of the knee joint  
49 provide structural integrity to the joint during both passive and active movements [25]. The  
50 incidence of injuries to the passive viscoelastic tissues, such as the anterior cruciate ligament  
51 (ACL), posterior cruciate ligament (PCL), medial collateral ligament (MCL), lateral collateral  
52 ligament (LCL), and menisci are well documented in the literature [4,37,38] as well as the  
53 predictive factors leading to injury [1,43].

54           The injury mechanisms at the knee joint are multifactorial and are complicated due to the  
55 requirements of specific movement activities performed in dynamic environments (i.e., athletics  
56 venues). Both contact and non-contact activities play critical roles in determining how the knee  
57 joint responds to the given loading conditions. The type of training, task, fatigue level of the  
58 individual, and anatomic structure all contribute to the potential injury of the knee joint [15,34].  
59 In particular, when landing from a given height, the knee biomechanics are modified to absorb  
60 energy to reduce the impact of the contact forces upon the lower extremities [41]. Females are  
61 reported to have greater knee valgus – a potential sign of knee injury at landing – compared to  
62 males, and thus a greater potential for knee injury [18,19,20]. Training individuals to land  
63 without excess knee valgus has been documented and may contribute to reduced knee joint  
64 injuries [7,31]. Nilstad et al.[26] used static laxity of the ligamentous tissues as a predictor  
65 variable for knee valgus, but could not conclude this was a factor responsible for increasing  
66 likelihood of knee injuries. Others, however, have determined the laxity of the knee joint

67 ligaments contribute to modifications of the neuromuscular control of the knee joint [8,9,28].  
68 The musculotendonous units contribute much more to the stability of the knee joint during  
69 dynamic tasks as the forces generated via the muscle are actively engaged in movement of the  
70 joint, as well as resistance to external forces acting upon the knee [30].

71 Neuromuscular fatigue of the muscles surrounding the knee joint and other lower  
72 extremity muscles are believed to be a contributing factor to knee injury. Lower extremity  
73 kinematics and myoelectric activity, collected with electromyography (EMG), is reported to  
74 significantly change at landing from a jump or drop after fatigue has been induced [29]. When  
75 the muscles become fatigued the ability to generate force is diminished and the internal moments  
76 have reduced capacity to resist the external moments applied [5]. The contribution of  
77 neuromuscular fatigue to knee joint injury is significant [34], however, it is unclear how the  
78 laxity of the ligamentous tissues contributes to the inability of the joint to maintain its integrity  
79 [26]. Neuromuscular fatigue requires the passive ligamentous tissues to be strained further to  
80 compensate for the deficiencies of the neuromuscular control. These ligamentous tissues are  
81 further loaded during the dynamic activities as tension-relaxation or mechanical creep are  
82 induced in parallel with neuromuscular fatigue [35]. Further assessment of the contribution of the  
83 passive ligamentous tissues during loading tasks is necessary to understand the mechanisms of  
84 injury.

85 Reductions in both force generating capacity and myoelectric activity of the musculature  
86 about the knee joint have been documented during isometric knee actions following passive  
87 loading of the knee joint capsule [9,28,33]. These tests serve to isolate the knee joint and provide  
88 a foundational understanding of the influence of loading schemes to the response of the  
89 neuromuscular and musculoskeletal systems. Functionally, little is known how passive loading

90 of the knee joint capsular tissues affects the movement of the joint during dynamic (athletic)  
91 activities.

92 The purpose of this study was to examine the mechanical and neuromuscular responses  
93 of the lower extremities to landing perturbations before and after passive loading of the knee  
94 joint capsule. It was hypothesized that passive static loading of the knee joint capsule would  
95 elicit a reduced myoelectric amplitude response from the surrounding musculature at landing.  
96 Further, it was also hypothesized that joint kinematics of the landing leg would compensate for  
97 the passive loading applied at the knee joint capsule during landing through changes in  
98 kinematics parameters.

## 99 METHODS

### 100 Participants

101 University students enrolled in kinesiology classes volunteered to participate in this  
102 study. Male ( $n = 7$ ) and female ( $n = 14$ ) participants ( $21.3 \pm 2.1$  years old,  $1.69 \pm 0.09$ m in  
103 height, and had a mass of  $69.3 \pm 13.0$  kg) were required to be healthy individuals with no  
104 medical conditions which would prevent physical activity, involved in regular physical activity  
105 (recreational activities at least 3 times/week), not have any trunk or lower extremity disorders,  
106 not have an injury to the head, trunk, and lower extremities within the previous 12 months of  
107 participation, and if female not be pregnant. Participants were provided an informed consent  
108 document approved by the university's Human Subjects Committee prior to the study.  
109 Participants agreed to voluntarily participate after reading the informed consent document.  
110 Additional verbal instructions were provided during the study. Participants were informed that  
111 they could withdraw without penalty at any time during the study.

## 112 Instrumentation

113 A 6-camera motion capture system (Qualisys, Gotenborg, Sweden) with Oqus 100  
114 camera sampling at 120 Hz was used to collect movement data. Palpation was used to place  
115 individual marker spheres of 14 mm diameter bilaterally over the acromion processes, posterior  
116 superior iliac spines (PSIS), and anterior superior iliac spines (ASIS). Unilateral markers were  
117 positioned over the sacrum at the S1, and the right leg at the greater trochanter, lateral femoral  
118 epicondyle, medial femoral epicondyle, lateral malleolus, medial malleolus, calcaneus, 1<sup>st</sup> and 5<sup>th</sup>  
119 metatarsophalangeal joints. Two four-marker clusters were position on the right leg at the  
120 midline of the lateral thigh and the proximal third of the lower leg and secured with Coband ©  
121 wrapping tape.

122 Surface electromyography (EMG) (Motion Lab System, Baton Rouge, LA, USA) was  
123 used to collect muscle activity from the right thigh musculature surrounding the knee. The skin  
124 was abraded and then cleaned with isopropyl alcohol. The 0.02 m diameter stainless steel  
125 electrodes have a fixed center to center distance of 0.02 m and bipolar configuration, and were  
126 positioned distal to the motor point of each muscle group and aligned parallel with the muscle  
127 fibers. Myoelectric signals were collected from the muscles rectus femoris (0.10 m distal from  
128 the right ASIS), vastus lateralis (0.10 m proximal and lateral form the patella), vastus medialis  
129 (0.10 m proximal and medial to the patella), semimembranosis (~0.20 m proximal to the medial  
130 femoral epicondyle), and the biceps femoris (~0.20 m proximal to the lateral femoral  
131 epicondyle). Surface EMG signals were bandpass filtered at 20-500 Hz with a common mode  
132 rejection ratio of > 100 dB at 60 Hz, an input impedance of > 100MΩ, and collected at 1200 Hz.

133 Kinetic data were collected with a 6 degree of freedom force platform (OR-6, AMTI,  
134 Watertown, MA, USA) with dimension 0.45 m x 0.5 m embedded and flush with the laboratory

135 floor. Force data were collected at 1200 Hz. Kinematic, EMG, and kinetic data were collected  
136 using the Qualisys Tracking Manager (QTM) software interfaced with a USB 2533 12 bit A/D  
137 board (Measurement Computing, Inc., Norton, MA, USA) and save for future processing.

#### 138 Protocol

139 Participants warmed up by walking on a motorized treadmill at their self-selected speed  
140 for 10 min. Kinematic markers and EMG electrodes were placed upon the participants after the  
141 warm-up. Participants performed single leg drop landings from a height of ~ 0.30 m using the  
142 right leg. Leg dominance was determined by asking the participants which leg they would use to  
143 kick a ball. All participants indicated right leg dominance. Participants began by standing on two  
144 legs on top of a box situated 0.10 m horizontal from the force platform. They were instructed to  
145 lean forward leading with the right leg in order to drop onto the force platform. Once they  
146 landed, the participants were instructed to maintain their one-legged stance and stand erect for 5  
147 s. The hands were positioned on the iliac crests to control arm movements. Participants were  
148 given up to 10 practice trials to acclimate to the drop landing task. Participants performed up to  
149 10 trials of drop landings before and after the knee joint capsule was loaded. At least 1 min of  
150 rest was provided between trials to reduce the influence of fatigue. Landing trials where the  
151 participants either jumped, stepped down, or could not maintain balance at landing were  
152 discarded and additional trials were performed until 5 sufficient trials were recorded.

153 After the initial drop landing trials, participants were positioned into a high-back chair of  
154 a Biodex system 3 dynamometer (Shirley, NY, USA). Participants were positioned with their  
155 trunk in an upright erect position with the hips in 90° flexion. Then an attachment arm was  
156 secured to the dynamometer axis, which was aligned with the lateral femoral epicondyle of the  
157 right leg. The attachment arm was secured to the leg 0.05 m proximal to the lateral malleolus.

158 Ramped maximal voluntary isometric efforts (MVIE) of 5 s were performed 3 times each with  
159 the knee at 90° flexion for extension trials and 45° flexion for knee flexion trials (full knee  
160 extension is 0°), respectively, with a 60 s rest between efforts. A 10 min rest period was  
161 performed after the last MVIE. The leg was then positioned so that the knee was flexed to 35°  
162 with reference to the anatomical position [9]. A cuff was secured 0.03 m distal to the femoral  
163 epicondyle and surrounded the proximal leg. A pulley system was configured to allow a cable to  
164 fit perpendicular to the leg and around the cuff. The cable was used to pull the leg anterior  
165 relative to the femur with a load of either 200 N (men) or 150 N (women). This protocol has  
166 been reported to increase laxity of the tissues surrounding the knee joint capsule and potentially  
167 the ligaments within the capsule [9]. The knee joint was statically loaded for 10 min. Surface  
168 EMG was used to ensure a low level of muscle activity relative to the MVIE was maintained  
169 during knee loading. Immediately after the loading protocol was completed, participants  
170 performed additional drop landing trials.

#### 171 Data Processing

172 The EMG signals collected during the static loading were centered, full wave rectified,  
173 and low pass filtered at 3 Hz with a fourth order zero-lag Butterworth filter. The EMG signals  
174 collected during drop landing trials were centered, rectified, and then low pass filtered at 5 Hz  
175 with a fourth order zero-lag Butterworth filter. All EMG data were then normalized to the  
176 maximum EMG value attained during MVIE.

177 Force data were processed with a low pass Butterworth filter set at 60 Hz using the  
178 MotionMonitor System software (MotionMonitor, Chicago, IL, USA). A vertical ground  
179 reaction force (VGRF) threshold of 20 N was established to determine the onset of load acceptance  
180 at landing. Force data were reduced to 120 Hz to coincide with the kinematics data.



181 Kinematics data were processed using the MotionMonitor software (MontionMonitor,  
182 Chicago, IL, USA). Kinematics data were smoothed with a fourth order low pass zero-lag  
183 Butterworth filter set at 10 Hz. A static reference file was used to determine lower extremity  
184 segment and joint angles using the right-hand configuration (x-anteroposterior, y-mediolateral, z-  
185 vertical axes, respectively). Based upon the static reference file, segmental coordinate systems  
186 were established and used in determining relative angles of adjacent segments. Further, Euler  
187 angle calculations were performed to determine segment orientations, which contributed to joint  
188 angular rotations (X – frontal plane, Y – sagittal plane, and Z – transverse plane) of the distal  
189 segments relative to the proximal segments.

#### 190 Data Analysis

191 Kinematics data were evaluated in all three planes of movement during the landing phase  
192 of the drop landing. Landing phase during the drop landing was assessed as the onset of the force  
193 platform threshold until the maximum knee flexion angle was attained. Joint angle parameters  
194 (maximum, minimum, and range of motion) were assessed using the right-hand rule as follows:  
195 at the knee joint, flexion-extension (about the y-axis), internal-external rotations (about the z-  
196 axis), and mediolateral rotations (about the x-axis). At the hip joint, hip flexion-extension (about  
197 the y-axis) and hip adduction/abduction (about the x-axis) were evaluated. Ankle plantarflexion  
198 and dorsiflexion movements were assessed as these movements have been reported to align with  
199 maximum knee joint flexion at landing (Fong et al., 2011). Angular velocities (maximum and  
200 minimum) of the three knee joint rotations were also calculated to determine differences between  
201 pre and post loading single leg landing trials.

202 Kinetic variables of concern were the maximum VGRF, force profile of the first 200 ms  
203 of landing, and the rate of force development (RFD). The RDF was calculated as the difference

204 in maximum VGRF and the VGRF at landing divided by the time between the maximum VGRF  
205 and VGRF at landing.

206 Surface EMG recordings during the static knee loading protocol were averaged the first  
207 30 s of each minute of the 10 min loading period. This was performed to ensure minimal muscle  
208 activity during the loading. Additionally, processed EMG signals were assessed during the first  
209 200 ms of the landing phase, as well as 200 and 100 ms prior to initiation of the landing to  
210 compare pre-loading and post-loading conditions. Pre-landing EMG signals were used to  
211 determine the preparation of the muscles surrounding the knee joint to the landing (feed-forward  
212 control). The 200 ms after landing was compartmentalized into four 50 ms intervals (0-50, 51-  
213 100, 101-150, and 151-200 ms) which were used to average the normalized EMG signals for  
214 evaluating the trend of the neuromuscular activity at landing. In addition, co-activation ratios of  
215 the average quadriceps and hamstring muscles EMG (Q:H) at landing were performed. Overall  
216 average and maximal EMG values from each muscle group were calculated during this 200 ms  
217 landing period.

## 218 Statistical Analyses

219 All statistical testing was performed with SPSS v 22.0 (Chigaco, IL, USA). Kinematics  
220 variables were analyzed using a one-way (condition) analysis of variance (ANOVA). A one-way  
221 ANOVA was performed to assess average muscle activity at each minute of static loading.  
222 Average and maximal EMG values during landing were analyzed with a 2 factor (condition x  
223 muscle) ANOVA. A three-factor, muscle x condition x time interval (5 x 2 x 4), ANOVA was  
224 performed on the average EMG, while a ratio x condition x time interval (6 x 2 x 5) ANOVA  
225 was performed on the Q:H ratio data. A 2 factor ANOVA was performed to assess the overall  
226 average and maximal Q:H ratios. Average and peak forces and RFD data were each analyzed

227 with a one-way ANOVA (condition). A 2-way ANOVA (condition x time interval) was used to  
 228 assess VGRF data during the landing phase, while one-way ANOVAs were used to compare  
 229 maximal and normalized maximal VGRF values between conditions. Tukey post-hoc  
 230 comparisons were performed when significant effects were present. A Mauchly's test of  
 231 Sphericity was performed to assess the normality of the data. A Greenhouse – Geisser test was  
 232 applied when normality was not attained. The level of significance was set at  $p \leq 0.05$ .

## 233 RESULTS

### 234 Electromyography

235 Average EMG values did not significantly change during the 10 min of static loading.  
 236 The average activity for each minute was under 5% of the MVIE, indicating minimum active  
 237 neuromuscular response to the external load (Table 1).

238 Table 1. Mean ( $\pm$  sd) of normalized surface electromyography as a percentage of MVIC from the  
 239 three quadriceps and two hamstring muscles during static loading of the knee joint capsule.

| Time (min) | Muscle Group (% MVIC) |            |            |            |            |
|------------|-----------------------|------------|------------|------------|------------|
|            | RF                    | VL         | VM         | SM         | BF         |
| 1          | 3.72 (3.8)            | 4.15 (2.6) | 3.59 (4.1) | 4.87 (4.3) | 2.80 (2.0) |
| 2          | 3.67 (4.2)            | 3.79 (2.0) | 2.67 (1.4) | 4.46 (4.0) | 3.45 (2.7) |
| 3          | 3.57 (4.3)            | 3.92 (2.5) | 2.78 (1.5) | 4.06 (3.4) | 3.09 (2.5) |
| 4          | 2.99 (3.2)            | 4.08 (2.4) | 2.73 (1.5) | 3.52 (2.5) | 2.82 (2.3) |
| 5          | 3.00 (3.2)            | 4.03 (2.7) | 2.73 (1.5) | 3.71 (2.9) | 2.71 (2.4) |
| 6          | 2.95 (3.1)            | 3.74 (2.1) | 2.66 (1.4) | 3.49 (2.5) | 2.56 (2.2) |
| 7          | 2.79 (2.9)            | 4.11 (2.9) | 2.60 (1.4) | 3.53 (2.5) | 2.79 (2.3) |
| 8          | 2.76 (2.9)            | 3.90 (2.1) | 2.89 (1.5) | 3.49 (2.5) | 2.57 (2.1) |
| 9          | 2.75 (2.9)            | 4.25 (2.8) | 2.71 (1.5) | 3.43 (2.4) | 2.50 (2.0) |
| 10         | 2.74 (3.0)            | 3.84 (1.8) | 3.06 (2.3) | 3.32 (2.4) | 2.34 (1.8) |

240 RF = rectus femoris; VL = vastus lateralis; VM = vastus medialis; SM = semimembranosus; BF  
 241 = biceps femoris

242

243

244

245 Overall Average and Maximal EMG during Landing

246 Average EMG values did not change between conditions ( $p > 0.55$ ), but were significant  
 247 between muscles ( $F_{4,199} = 5.347$ ,  $p < 0.01$ ). There was no significant condition x muscle  
 248 interaction effect ( $p > 0.87$ ) (Table 2). Peak EMG values were not significant between conditions  
 249 ( $p > 0.34$ ), but were significant between muscles ( $F_{4,180} = 9.553$ ,  $p < 0.01$ ) (Table 2). There were  
 250 no significant interaction effects present ( $p > 0.97$ ).

251 Table 2. Mean (sd) peak and average NEMG as a percentage of MVIC from the three quadriceps  
 252 and two hamstring muscles during drop landings.

| Muscle | Peak NEMG       |                 | Overall         | Average NEMG   |                | Overall         |
|--------|-----------------|-----------------|-----------------|----------------|----------------|-----------------|
|        | Pre             | Post            |                 | Pre            | Post           |                 |
| RF     | 115.1<br>(62.0) | 117.5<br>(55.0) | 116.3<br>(57.9) | 45.1<br>(30.1) | 47.7<br>(28.3) | 46.4<br>(28.9)* |
| VM     | 43.3<br>(44.9)  | 45.2<br>(54.9)  | 44.2<br>(49.3)^ | 28.4<br>(32.3) | 24.1<br>(22.9) | 26.2<br>(27.7)  |
| VL     | 98.3<br>(61.6)  | 104.2<br>(50.3) | 101.3<br>(55.2) | 50.6<br>(36.9) | 61.9<br>(55.1) | 56.3<br>(46.6)† |
| BF     | 86.5<br>(56.2)  | 97.4<br>(61.8)  | 92.2<br>(58.7)  | 38.5<br>(28.3) | 39.1<br>(28.0) | 38.8<br>(27.8)  |
| SM     | 64.0<br>(30.6)  | 80.9<br>(55.5)  | 73.1‡<br>(46.0) | 30.7<br>(15.3) | 34.2<br>(29.1) | 32.4<br>(23.0)  |

253 \*indicates RF significantly greater than VM ( $p < 0.01$ )

254 †indicates VL significantly greater than VM, BF, and SM muscle groups (all  $p < 0.02$ )

255 ^indicates VM significantly less than all other muscle groups (all  $p < 0.03$ )

256 ‡Indicates SM significantly different than RF, VL, and VM (all  $p < 0.03$ )

257

258 A significant time interval x muscle interaction was present ( $F_{20, 1189} = 1.951$ ,  $p < 0.01$ )  
 259 when observing the average EMG signals at landing. Post-hoc analysis indicated a significant  
 260 difference between time intervals ( $p < 0.001$ ) and muscle groups ( $p < 0.001$ ). There were no  
 261 significant condition effects ( $p > 0.27$ ), nor condition x time interval ( $p > 0.99$ ) or condition x  
 262 muscle interaction ( $p > 0.99$ ) effects present (Figure 1).

263

\*\*\*Figure 1 here\*\*\*

264 Figure 1. Mean (sd) normalized EMG from pre and post-landing conditions for rectus femoris  
 265 (RF), vastus lateralis (VL), vastus medialis (VM), biceps femoris (BF), and semimembranosus  
 266 (SM) muscle groups. EMG activity is provided in 50ms intervals during the first 200ms of  
 267 landing. Pre-landing ratios are provided 200ms and 100 ms prior to the landing.

268

269 EMG ratios during Landing

270 The average EMG ratio values were not significant between conditions (pre:  $1.34 \pm 1.2$ ,  
 271 post:  $1.47 \pm 1.2$ ,  $p > 0.66$ ), but were different between muscle ratios ( $F_{5,231} = 4.919$ ,  $p < 0.01$ )  
 272 (Table 3). There was no significant condition x ratio interaction effect ( $p > 0.96$ ). Peak EMG  
 273 ratios were not significant between conditions ( $p > 0.87$ ), but were significant between muscle  
 274 ratios ( $F_{5,187} = 6.806$ ,  $p < 0.01$ ) (Table 4). There were no significant condition x muscle ratio  
 275 interaction effects ( $p > 0.58$ ).

276 Table 3. Mean (sd) average muscle ratios during the landing phase between pre and post landing  
 277 conditions.

| Condition | Muscle Ratio |             |            |             |            |             | Total      |
|-----------|--------------|-------------|------------|-------------|------------|-------------|------------|
|           | RF/BF        | VL/BF       | VM/BF      | RF/SM       | VL/SM      | VM/SM       |            |
| Pre       | 1.27 (0.9)   | 0.78 (0.7)  | 1.50 (1.0) | 1.50 (0.9)  | 1.05 (1.0) | 1.91 (1.7)  | 1.34 (1.1) |
| Post      | 1.35 (0.9)   | 0.78 (0.6)  | 1.84 (1.6) | 1.86 (1.7)  | 1.05 (1.0) | 1.92 (1.7)  | 1.46 (1.4) |
| Overall   | 1.31 (0.9)‡  | 0.78 (0.6)* | 1.67 (1.4) | 1.68 (1.3)† | 1.05 (1.0) | 1.92 (1.7)# | 1.40 (1.5) |

278 RF = rectus femoris; VL = vastus lateralis; VM = vastus medialis; SM = semimembranosus; BF  
 279 = biceps femoris

280 \*indicates VL/BF is significantly less than VM/BF, RF/SM, and VM/SM (all  $p < 0.01$ )

281 †indicates RF/SM is significantly greater than VL/SM ( $p < 0.01$ )

282 ‡indicates RF/BF is significantly less than VM/SM ( $p < 0.04$ )

283 #indicates VM/SM is significantly less than VL/SM ( $p < 0.01$ )

284

285 Table 4. Mean (sd) maximal muscle ratios during the landing phase between pre and post landing  
286 conditions.

| Condition | Muscle Ratio |             |            |            |             |             | Total      |
|-----------|--------------|-------------|------------|------------|-------------|-------------|------------|
|           | RF/BF        | VL/BF       | VM/BF      | RF/SM      | VL/SM       | VM/SM       |            |
| Pre       | 1.47 (0.6)   | 1.01 (0.8)  | 1.64 (1.3) | 2.34 (1.5) | 0.75 (0.7)  | 1.88 (1.15) | 1.48 (1.2) |
| Post      | 1.67 (1.5)   | 0.57 (0.6)  | 1.98 (2.0) | 1.73 (1.1) | 0.69 (0.7)  | 2.25 (2.3)  | 1.47 (1.6) |
| Overall   | 1.59 (1.2)   | 0.78 (0.7)* | 1.82 (1.7) | 2.01 (1.3) | 0.72 (0.7)† | 2.09 (1.9)‡ | 1.47 (1.4) |

287 RF = rectus femoris; VL = vastus lateralis; VM = vastus medialis; SM = semimembranosus; BF  
288 = biceps femoris

289 \*indicates VL/BF is significantly less than RF/BF, VM/BF, and RF/SM (all  $p < 0.01$ )

290 †indicates VL/SM is significantly less than RF/BF, VM/BF, and RF/SM (all  $p < 0.02$ )

291 ‡indicates VM/SM is significantly greater than VL/BF and VL/SM (all  $p < 0.04$ )

292

293 A significant difference was present between muscle ratios ( $F_{5,1317} = 38.182, p < 0.001$ )

294 and between time intervals ( $F_{5,1317} = 9.87, p < 0.001$ ) (Figure 2). There were no significant

295 condition effects ( $p > 0.88$ ), nor were there condition x ratio ( $p > 0.99$ ), condition x timing

296 interval ( $p > 0.44$ ), or condition x timing interval x muscle ratio ( $p > 0.99$ ) interaction effects

297 present.

298 \*\*\*Figure 2 here\*\*\*

299 Figure 2. Mean (sd) quadriceps to hamstring ratios from pre and post-landing conditions (rectus  
300 femoris (RF), vastus lateralis (VL), vastus medialis (VM), biceps femoris (BF), and  
301 semimembranosus (SM) muscle groups). EMG activity is provided in 50ms intervals during the  
302 first 200ms of landing. Pre-landing ratios are provided 200ms and 100 ms prior to the landing.

303

304 Kinematics

305 Maximum and minimum angular displacement data from the hip, knee, and ankle joints

306 are provided in Table 5. Although not significant, a trend was present between conditions for

307 ankle flexion maximum ( $p > 0.071$ ). All other maximum and minimum displacement data were  
 308 not significant between conditions.

309 Table 5. Mean (sd) maximum and minimum angular displacements ( $^{\circ}$ ) at the hip, knee, and ankle  
 310 joints during drop landings before (Pre) and after (Post) static passive loading of the knee joint  
 311 capsule.

|                | Maximum    |             | p-value | Minimum      |              | p-value |
|----------------|------------|-------------|---------|--------------|--------------|---------|
|                | Pre        | Post        |         | Pre          | Post         |         |
| Hip flexion    | 22.0 (6.8) | 19.7 (9.2)  | 0.38    | 9.2 (3.0)    | 6.2 (6.6)    | 0.15    |
| Knee flexion   | 60.8 (7.8) | 60.9 (8.3)  | 0.97    | 16.4 (4.8)   | 15.7 (9.7)   | 0.67    |
| Ankle flexion  | 1.9 (16.9) | -1.9 (12.6) | 0.071   | -52.7 (14.5) | -51.4 (15.4) | 0.61    |
| Hip Abduction  | 14.0 (8.9) | 11.3 (8.6)  | 0.13    | -7.6 (13.9)  | -6.4 (11.0)  | 0.59    |
| Knee abduction | -4.0 (8.3) | -4.2 (6.2)  | 0.94    | -30.5 (11.9) | -32.7 (14.1) | 0.29    |
| Knee rotation  | 16.2 (5.8) | 16.7 (9.5)  | 0.77    | 1.7 (6.9)    | 2.8 (2.4)    | 0.48    |

312

313 Table 6 provides angular velocity data measured from the hip, knee, and ankle joints. Hip  
 314 abduction maximum velocity was significant between conditions ( $F_{1,3} = 43.5$ ,  $p < 0.007$ ). A  
 315 significant difference between conditions was present ( $F_{1,9} = 7.963$ ,  $p < 0.02$ ) for minimum knee  
 316 flexion velocity. Minimum knee abduction velocity was significant between conditions ( $F_{1,9} =$   
 317  $19.35$ ,  $p < 0.002$ ). All other angular velocities in sagittal, frontal, and transverse planes were not  
 318 statistically different between conditions.

319 Table 6. Mean (sd) maximum and minimum angular velocities ( $^{\circ}/s$ ) at the hip, knee, and ankle  
 320 joints during drop landings before (Pre) and after (Post) static passive loading of the knee joint  
 321 capsule.

|                | Maximum       |               | p-value           | Minimum         |                | p-value           |
|----------------|---------------|---------------|-------------------|-----------------|----------------|-------------------|
|                | Pre           | Post          |                   | Pre             | Post           |                   |
| Hip flexion    | 204.9 (76.4)  | 227.0 (46.5)  | 0.43              | -60.9 (62.2)    | -65.5 (73.5)   | 0.78              |
| Knee flexion   | 527.9 (131.6) | 544.1 (168.7) | 0.59              | -14.9 (25.2)    | -27.9 (34.2)   | <b>&lt; 0.02</b>  |
| Ankle flexion  | 792.3 (104.9) | 544.1 (168.7) | 0.66              | -4.7 (21.3)     | -17.0 (41.5)   | 0.21              |
| Hip Abduction  | 87.1 (56.9)   | 56.9 (63.4)   | <b>&lt; 0.007</b> | -304.2 (101.2)  | -291.7 (62.6)  | 0.57              |
| Knee abduction | 90.0 (48.4)   | 99.7 (50.5)   | 0.53              | -528.5 (127.5)† | -399.9 (129.3) | <b>&lt; 0.002</b> |
| Knee rotation  | 306.3 (99.9)  | 276.4 (89.5)  | 0.30              | -125.9 (51.4)   | -141.5 (45.2)  | 0.46              |

322  $p < 0.05$  is indicated in bold

323 Table 7 provides ROM data for the hip, knee, and ankle joints. Ankle ROM was  
324 significant between conditions ( $F_{1,166} = 7.904$ ,  $p < 0.006$ ). No other ROM variables were  
325 significantly different between conditions.

326 Table 7. Mean (sd) values of ROM of the hip, knee, and ankle joints before (Pre) and after (Post)  
327 static passive loading of the knee joint capsule.

| 328 | Angle (°)      | Pre         | Post        | p-value           |
|-----|----------------|-------------|-------------|-------------------|
| 329 | Hip flexion    | 15.9 (8.6)  | 16.6 (8.8)  | 0.64              |
|     | Knee flexion   | 46.3 (9.8)  | 46.8 (9.8)  | 0.73              |
|     | Ankle flexion  | 56.2 (8.5)  | 52.6 (8.5)  | <b>&lt; 0.006</b> |
| 330 | Hip abduction  | 19.3 (11.1) | 18.5 (11.4) | 0.71              |
|     | Knee abduction | 21.5 (13.0) | 21.9 (12.8) | 0.82              |
| 331 | Knee rotation  | 14.5 (8.1)  | 14.2 (8.1)  | 0.79              |

### 332 Kinetics

333 Absolute peak VGRFs were not different between conditions (pre  $1550.5 \pm 84.6$  N, post  
334  $1548.1 \pm 55.8$  N,  $p > 0.91$ ). No significant condition effects were present for normalized peak  
335 forces (pre:  $2.25 \pm 0.3$ , post:  $2.24 \pm 0.2$ ,  $p > 0.76$ ). Similarly, the rate of force development was  
336 not significantly different between conditions, but did have a trend (pre:  $16,602.0 \pm 1057.0$  N/s,  
337 post:  $17,368.0 \pm 1447.6$  N/s,  $p > 0.076$ ).

### 338 Force timing

339 Significant main effects for condition ( $F_{1,787} = 5.593$ ,  $p < 0.02$ ) and time interval ( $F_{3,787} =$   
340  $128.217$ ,  $p < 0.001$ ) were present. The average force over the first 200ms of contact at landing  
341 was  $1297.1 (\pm 392.4)$  N before and  $1231.3 (\pm 392.4)$  N after knee loading. There were no  
342 significant condition x time interval interaction effects ( $p > 0.56$ , Figure 3).

343



344 \*\*\*Figure 3 here\*\*\*

345 Figure 3. Mean (sd) vertical ground reaction forces measured at 50 ms intervals from initial  
346 landing to 200ms during each condition (pre and post).

347

## 348 DISCUSSION

349 The aim of this study was to assess the neuromuscular and kinematics responses of the  
350 landing leg during single-leg drop landings before and after passive static loading of the knee  
351 joint capsule. Based upon previous research involving passive loading of the knee joint capsule,  
352 it was believed that neuromuscular and biomechanical behaviors would be modified in the lower  
353 extremity at landing. The reasoning for this study was twofold: 1) mechanical loading of the  
354 viscoelastic passive tissues is known to influence mechanical behavior changes of the affected  
355 (loaded) tissues, as well as the EMG response of the surrounding muscles, and 2) in the absence  
356 of neuromuscular fatigue it is not known how the lower extremity will respond to a perturbation  
357 given during a functional activity once passive loading of the knee joint is performed. The initial  
358 hypothesis predicted a reduction in EMG amplitude of the muscles surrounding the knee joint at  
359 landing after passive knee joint loading. However, this hypothesis was not supported based upon  
360 the results. There were no significant neuromuscular changes between conditions, however, the  
361 EMG ratios provide information indicating specific relationships between the quadriceps and  
362 hamstrings muscle groups. It was also assumed that the neuromuscular system would  
363 compensate for the reduced mechanical tension within the passive connective tissues to increase  
364 coactivation in the drop phase prior to landing. This, however, was not substantiated in the data  
365 and cannot be considered a control mechanism of the leg at landing in this study. The second  
366 hypothesis regarding compensation of joint motion due to the passive loading at the knee joint

367 capsule was partially supported. Distinct modifications to hip, knee, and ankle kinematics during  
368 landing resulted from the static loading. Further, the overall average VGRF decreased after static  
369 loading, while no changes in the maximal force was evident.

#### 370 Electromyography

371 Neuromuscular control determined the response of the landing leg during the drop  
372 landing. Low level myoelectric activity from both hamstrings and quadriceps muscles groups  
373 assisted in preparing the leg for landing. This feed-forward mechanism allows the neuromuscular  
374 system to engage immediately once contact with the support surface is initiated to prevent the leg  
375 from buckling. Once landing occurred, greater muscle responses were observed to reduce joint  
376 angular motions. There were significant differences between the muscles groups at landing.  
377 Overall peak EMG values were greatest in the RF group and least in the VM muscles group.  
378 However, average EMG values were greatest from the VL group, and least in the VM group.  
379 This is expected as the VL muscles group has been reported to be activated at higher relative  
380 levels during similar tasks [30].

381 The descent phase of landing requires knee extensor muscles to perform eccentric actions  
382 to diminish flexion of the knee joint. The EMG signals of all muscles examined increased as the  
383 knee approached maximum flexion. The contribution of the VL and RF muscles were much  
384 greater than that of the VM, indicating differential control within the knee extensors. This may  
385 indicate the inability of the VM muscle group to provide a primary role in joint stability, which  
386 may be due to architectural factors [10]. The increased myoelectric amplitudes are expected from  
387 the knee extensors, but not necessarily from the knee flexor muscles. The SM muscle group  
388 showed high activation levels in both conditions indicating that this muscle group was more  
389 actively involved in the control of leg mechanics compared to the BF muscle. There are two

390 explanations which exemplify the activation of the hamstrings at landing: 1) the hamstring  
391 muscle activities are indicative of control at the hip joint to reduce hip joint flexion motion  
392 during the landing phase, and 2) sufficient hamstring muscle activity is required to compensate  
393 for anterior translation of the tibia [3].

394 The ratios of quadriceps to hamstrings muscle groups were assessed to identify changes  
395 in the coactivation of the thigh musculature. The largest Q:H EMG ratio was observed in the  
396 VL/BF relationship during the entire preparation and landing phases. Reduced BF muscle  
397 activity is suggested to increase knee internal rotation in a small sample of female athletes [14].  
398 In patients who have undergone ACL reconstruction, modifying landing instruction to increase  
399 knee flexion at landing was reported to also reduce BF activity [11]. Although the BF activity  
400 was relatively lower than other muscles surrounding the knee, this did not influence overall knee  
401 rotation at landing (Table 5).

#### 402 Kinematics

403 Compensatory changes in the movement velocities at the knee and hip during the landing  
404 phase highlight the modified control which the musculoskeletal system uses to respond to the  
405 dynamic loading. First, the rate of hip abduction at landing was significantly reduced even  
406 though the displacement of the hip joint during landing did not change between landing  
407 conditions (Table 4). Reduced hip abduction angular velocity suggests potential increase in hip  
408 adductor contribution during the landing. This reduced hip abduction velocity may compensate  
409 for the mechanics observed at the knee joint. The ability of the leg to absorb the shock at landing  
410 may have been due to greater emphasis of control at the knee as greater negative knee flexion  
411 angular velocity was observed. In addition, a reduced knee abduction negative velocity would  
412 indicate a greater control of frontal plane knee rotations and less mechanical energy being

413 absorbed. Norcross et al. [27] reported knee landing kinematics differences between ACL injury  
414 risk groups and noted greater increased ligament loading with greater energy absorption. It is  
415 possible that the mechanical energy absorbed by each joint at landing was modified and could  
416 explain how control at each joint was performed.

417         The knee joint kinematics may have influenced the range of motion observed from the  
418 ankle joint after the passive loading. Overall ankle joint range of motion decreased, while no  
419 maximum or minimum angular displacement measures were different between the landing  
420 conditions. Fong et al. [13] noted that passive ankle joint range of motion was related to greater  
421 knee flexion at landing leading to reduced stress in the ACL, specifically. Although greater range  
422 of motion can reduce the forces acting upon the joints at landing, Butler et al. [6] suggest  
423 increased joint stiffness is important for successful landing mechanics. However, increased limb  
424 stiffness is also a factor in potential lower extremity injury, particularly in female athletes  
425 [22,24]. Additionally, maximal hip abduction velocity decreased, minimum knee flexion angular  
426 velocity increased in magnitude, and knee abduction velocity decreased indicating potential  
427 neuromuscular control enhancement of the muscles surrounding the joints.

#### 428 Kinetics

429         Significant reductions in the average VGRF after static loading of the knee joint was  
430 present. Initially, it could be suggested that the landing style changed between conditions,  
431 however, there was no kinematics evidence to suggest foot position changed at the initial contact  
432 with the support surface. Although a reduced range of motion at the ankle joint in plantar-  
433 dorsiflexion was observed, this was not believed to influence the landing, especially within the  
434 first 10 ms of the landing, which is a critical time period of knee injuries at landing. Kernozek et  
435 al. [19] observed a non-significant trend of reduced peak VGRF, as well as reduced internal joint

436 reaction forces during drop landings performed after fatiguing the thigh musculature. Similarly,  
437 Laughlin et al. [23] reported reduced peak VGRFs and peak ACL forces when female  
438 participants were instructed to land with greater knee flexion during drop landing. They observed  
439 kinematics differences at initial contact and peak ACL force from the hip and knee joints which  
440 explained their findings.

441         Although not tested, the stiffness of the leg influences the ability of the system to resist  
442 external loads applied. In particular, the musculotendonous stiffness influences the knee joint  
443 loading and ability to dissipate mechanical energy. Greater joint stiffness at landing when the  
444 knee is more extended leads to increased injury potential [12,16]. Hamstring musculotendonous  
445 stiffness has been reported to reduce the loading of the ACL and limit frontal plane rotations [2].  
446 This is significant as the current study was implemented to reduce stiffness in the tissues within  
447 and surrounding the knee joint. In addition, joint stiffness has been reported to be greater in  
448 females compared to males at landing [24]. This may serve as an initial protective mechanism for  
449 the joint at landing, but may act to increase the chances of knee ligament injury.

#### 450 Knee Joint Loading

451         Isolation of the knee joint utilizing specific loading schemes to assess the neuromuscular  
452 responses of the surrounding joint musculature provides biomechanical information of the  
453 factors associated with knee joint injury mechanisms, in the absence of neuromuscular fatigue.  
454 When muscles become fatigued more of the load/stress is transferred to the passive viscoelastic  
455 tissues to maintain joint integrity during functional movements. Although not a functional  
456 loading scheme, the passive loading implemented in the current study has been shown to elicit  
457 creep behavior of the tissues within and surrounding the knee joint capsule [8,9]. Evidence of the  
458 influence of these mechanical creep experiments has provided mixed information, but this is also

459 dependent upon the specific intentions of each study. Cheng et al. [8] initiated posterior loading  
460 of the tibia to elicit posterior cruciate ligament creep and reported reduced co-activation of the  
461 antagonist thigh muscles during knee extension activities. Chu et al. [9], however, noted  
462 increased force and agonist activation during maximal effort knee extension exercises with no  
463 changes in antagonist (hamstring) activities. Further evidence of passive tissue loading within  
464 and surrounding the knee joint demonstrates reduced agonist and antagonist muscle activities in  
465 maximal efforts [28,33], indicating a potential neuromuscular inhibition which may impede  
466 function of the muscle during activity. Specifically, Nuccio et al. [28] report significant  
467 reductions in the biceps femoris muscle activity after cyclic loading during both knee flexion and  
468 knee extension static efforts.

469         It must be emphasized that isolated loading of specific tissues, such as the ACL or PCL  
470 in the knee joint capsule, are not directly linked in *in vivo* studies. Unlike animal models where  
471 tissues can be isolated for perturbation/loading to determine the effects of mechanical  
472 manipulation of the specimen [36,39,40], there are factors which constitute how human models  
473 can be interpreted. Loading of the knee joint involves applying mechanical creep to the  
474 surrounding musculotendonous units, ligamentous tissues, meniscus, and other connective  
475 tissues which assist in maintaining the functional dynamics of the knee during physical activity.  
476 Particularly when applying these anteriorly directed loads, the musculotendonous units of the  
477 hamstrings muscle group can be strained leading to potential modifications in the activation level  
478 and stiffness of the muscle [2]. Shear stress of the meniscus during anterior loading is reported to  
479 differ between femoral and tibial anterior and posterior attachments, as well as medial and lateral  
480 attachments leading to an overall disparity in load distribution in ACL-deficient knees [42].

481

482 CONCLUSIONS

483           Implementation of a static load to the knee joint capsule modified movement parameters  
484 during a drop landing performance. Tissue-level behavioral changes may be present to influence  
485 how the lower extremity joints respond to dynamic loading. Neuromuscular modifications were  
486 not present between the landing conditions indicating that this loading scheme does not result in  
487 altered neuromuscular control. Additional research is warranted to examine potential  
488 modifications to the loading schemes to further understand how the neuromechanics of the lower  
489 extremities are modified when controlling for fatigue.

490

491 REFERENCES

- 492 1. Bates NA, Nesbitt RJ, Shearn, JT, Myer GD, Hewett TE. Relative strain in the anterior  
493 cruciate ligament and medial collateral ligament during simulated jump landing and side  
494 step cutting tasks: implications of injury risk. *Am J Sports Med.* 2015;43:2259-2269.
- 495 2. Blackburn JT, Norcross MF, Cannon LN, Zinder SM. Hamstring stiffness and landing  
496 biomechanics linked to anterior cruciate ligament loading. *J Athl Train.* 2013;48: 764-  
497 772.
- 498 3. Blackburn JT, Norcross MF, Padua DA. Influence of hamstring stiffness and strength on  
499 anterior knee joint stability. *Clin Biomech (Bristol, Avon).* 2011;26: 278-283.
- 500 4. Bollier M, Smith PA. Anterior cruciate ligament and medial collateral ligament injuries. *J*  
501 *Knee Surg.* 2014;27: 359-368.
- 502 5. Brazen DM, Todd MK, Ambgaonkar JP, Wunderlich R, Peterson C. The effects of  
503 fatigue on landing biomechanics in single-leg drop landings. *Clin J Sports Med.*  
504 2010;20:286-292.
- 505 6. Butler RJ, Crowell III HP, Davis IM. Lower extremity stiffness: implications for  
506 performance and injury. *Clin Biomech (Bristol, Avon).* 2003;18: 511-517.
- 507 7. Chappell JD, Limpisvasti O. Effects of a neuromuscular training program on the kinetics  
508 and kinematics of jumping tasks. *Am J Sports Med.* 2008;36: 1081-1086.
- 509 8. Cheng X, Ahang T, Shan X, Wang J. Effect of posterior cruciate ligament creep on  
510 muscle co-activation around the knee: a pilot study. *J Electromyog Kines.* 2014;24:271-  
511 276.



- 512 9. Chu D, LeBlanc R, D'Ambrosia P, D'Ambrosia R, Baratta RV, Solomonow M.  
513 Neuromuscular disorders in response to anterior cruciate ligament creep. *Clin Biomech*  
514 (Bristol, Avon). 2003;18:22-30.
- 515 10. de Souza LML, Cabral HV, de Oliveira LF, Vieira TM. Motor units in vastus lateralis  
516 and in different vastus medialis regions show different firing properties during low-level,  
517 isometric knee extension contraction. *Hum Move Sci*. 2018;58: 307-314.
- 518 11. Elias ARC, Hammill CD, Mizner RL. Changes in quadriceps and hamstring  
519 cocontraction following landing instruction in patients with anterior cruciate  
520 reconstruction. *J Ortho Sports Phys Ther*. 2015;45:273-280.
- 521 12. Fagenbaum R, Darling WG. Jump landing strategies in male and female college athletes  
522 and the implications of such strategies for anterior cruciate ligament injury. *Am J Sports*  
523 *Med*. 2003;31:233-240.
- 524 13. Fong CM, Blackburn JT, Norcross MF, McGrath M, Padua DA. Ankle-dorsiflexion  
525 range of motion and landing biomechanics. *J Athl Train*. 2011;46:5-10.
- 526 14. Fujii M, Sato H, Takahira N. Muscle activity response to external moment during single-  
527 leg drop landing in young basketball players: the importance of biceps femoris in  
528 reducing internal rotation of knee during landing. *J Sports Sci Med*. 2012;11: 255-259.
- 529 15. Heebner NR, Rafferty DM, Wohleber MF, Simonson AJ, Lovalekar M, Reinert A, Sell  
530 TC. Landing kinematics and kinetics at the knee during different landing tasks. *J Athl*  
531 *Train*. 2017;52:1101-1108.
- 532 16. Hewett TE, Myer GD, Ford KR. Anterior cruciate ligament injuries in female athletes:  
533 part 1, mechanisms and risk factors. *Am J Sports Med*. 2006;34:299-311.

- 534 17. Ingram JG, Fields SK, Yard EE, Comstock RD. Epidemiology of knee injuries among  
535 boys and girls in US high school athletics. *Am J Sports Med.* 2008;36:1116-1122.
- 536 18. Jenkins WL, Williams III DSB, Wiliams K, Hefner J, Welch H. Sex differences in total  
537 frontal plane knee movement and velocity during a functional single-leg landing. *Phys  
538 Ther Sport.* 2017;24:1-6.
- 539 19. Kernozek TW, Torry MR, Iwasaki M. Gender differences in lower extremity landing  
540 mechanics caused by neuromuscular fatigue. *Am J Sports Med.* 2008;36:554-565.
- 541 20. Kernozek TW, Torry MR, van Hoof H, Cowley H, Tanner S. Gender differences in  
542 frontal and sagittal plane biomechanics during drop landings. *Med Sci Sport Exer.*  
543 2005;37:1003-1012.
- 544 21. Kraus T, Svehlik M, Singer G, Schalamon J, Zwick E, Linhart W. The epidemiology of  
545 knee injuries in children and adolescents. *Arch Orthop Trauma Surg.* 2012;132:773-779.
- 546 22. Leppänen M, Pasanen K, Kujala UM, Vasankari T, Kannus P, Äyrämo S, et al. Stiff  
547 landings are associated with increased ACL injury risk in young female basketball and  
548 floorball players. *Am J Sports Med.* 2017;45:386-393.
- 549 23. Loughlin WA, Weinhandl JT, Kernozek TW, Cobb SC, Keenan KG, O'Connor KM. The  
550 effects of single-leg landing technique on ACL loading. *J Biomech.* 2011;44:1845-1851.
- 551 24. Lyle MA, Valero-Cuevas FJ, Gregor RJ, Powers CM. Control of dynamic foot-ground  
552 interactions in male and female soccer athletes: females exhibit reduced dexterity and  
553 higher limb stiffness during landing. *J Biomech.* 2014;22;512-517.
- 554 25. McLean SG, Lucey SM, Rohrer S, & Brandon C. Knee anatomy predicts high-risk in  
555 vivo dynamic landing knee biomechanics. *Clin Biomech (Bristol, Avon).* 2010;25:781-  
556 788.

- 557 26. Nilstad A, Krosshaug T, Mok K-M, Bahr R, & Andersen TE. Association between  
558 anatomical characteristics, knee laxity, muscle strength, and peak knee valgus during  
559 vertical drop-jump landing. *J Orthop Sports Phys Ther.* 2015;45:998-1005.
- 560 27. Norcross MF, Lewek MD, Padua DA, Schultz SJ, Weinhold PS, Blackburn JT. Lower  
561 extremity energy absorption and biomechanics during landing, part 1: sagittal-plane  
562 energy absorption analyses. *J Athl Train.* 2013;48:748-756.
- 563 28. Nuccio S, Labanca L, Rocchi JE, Macaluso A, Sbriccoli P. Neuromechanical response to  
564 passive cyclic loading of the ACL in non-professional soccer players: a pilot study. *Phys  
565 Ther Sport.* 2018;32:187-193.
- 566 29. Ortiz A, Olson SL, Etnyre B, Trudelle-Jackson EE, Bartlett W, Venegas-Rios HL.  
567 Fatigue effects on knee joint stability during two jump tasks in women. *J Strength Cond  
568 Res.* 2010;24:1019-1027.
- 569 30. Palmieri-Smith RM, Kreinbrink J, Ashton-Miller JA, Wojtys EM. Quadriceps inhibition  
570 induced by an experimental knee joint effusion affects knee joint mechanics during a  
571 single-legged drop landing. *Am J Sports Med.* 2007;35(8): 1269-1274.
- 572 31. Pollard CD, Sigward SM, Powers CM. ACL injury prevention training results in  
573 modification of hip and knee mechanics during a drop-landing task. *Orthop J Sports Med.*  
574 2017;5:1-7.
- 575 32. Salem HS, Shi WJ, Tucker BS, Dodson CC, Ciccotti MG, Reedman KB, Cohen SB.  
576 Contact versus noncontact anterior cruciate ligament injuries: is mechanism of injury  
577 predictive of concomitant knee pathology? *Arthroscopy.* 2018;34:200-204.
- 578 33. Sbriccoli P, Solomonow M, Zhou BH, Lu Y, Sellards R. Neuromuscular response to  
579 cyclic loading of the anterior cruciate ligament. *Am J Sports Med.* 2005;33:543- 551.

- 580 34. Schmitz RJ, Kim H, Schultz S. Neuromuscular fatigue and tibiofemoral joint  
581 biomechanics when transitioning from non-weight bearing to weight bearing. *J Athl*  
582 *Train.* 2015;50:23-29.
- 583 35. Solomonow M. Sensory-motor control of ligaments and associated neuromuscular  
584 disorders. *J Electromyog Kines.* 2006;16:549-567.
- 585 36. Solomonow M, Zhou BH, Baratta RV, Burger E. Biomechanics and electromyography of  
586 a cumulative lumbar disorder: response to static flexion. *Clin Biomech (Bristol, Avon).*  
587 2003;18:890-898.
- 588 37. Swenson DM, Collins CL, Best TM, Flanigan DC, Fields SK, Comstock RD.  
589 Epidemiology of knee injuries among U.S. high school athletes, 2005/06-2010/11. *Med*  
590 *Sci Sport Exer.* 2013;45:462-469.
- 591 38. Thein R, Hershkovich O, Gordon B, Burstein G, Tenenbaum S, Derazne E, et al. The  
592 prevalence of cruciate ligament and meniscus knee injury in young adults and  
593 associations with gender, body mass index, and height a large cross-sectional study. *J*  
594 *Knee Surg.* 2017;30:565-570.
- 595 39. Thornton GM, Frank CB, Shrive NG. Ligament creep behavior can be predicted from  
596 stress relaxation by incorporating fiber recruitment. *J Rheol.* 2001;45: 493-507.
- 597 40. Thornton GM, Schwab TD, Oxland TR. Fatigue is more damaging than creep in ligament  
598 revealed by modulus and residual strength. *Ann Biomed Eng.* 2007;35:1713-1721.
- 599 41. Verniba D, Vescovi JD, Hood DA, Gage WH. The analysis of the knee joint loading  
600 during drop landing from different heights and under different instruction sets in healthy  
601 males. *Sports Med.* 2017;3:6. doi: 10.1186/s40798-016-0072-x

- 602        42. Yao J, Snibbe J, Maloney M, Lerner AL. Stress and strains in the medial meniscus of an  
603            ACL deficient knee under anterior load: a finite element analysis with image-based  
604            experimental validation. *J Biomech Eng.* 2005;128:135-141.
- 605        43. Zazulak BT, Hewett TE, Reeves NP, Goldberg B, Cholewicki J. Deficits in  
606            neuromuscular control of the trunk predict knee injury risk. A prospective biomechanical-  
607            epidemiological study. *Am J Sports Med.* 2007;35:1123-30.
- 608

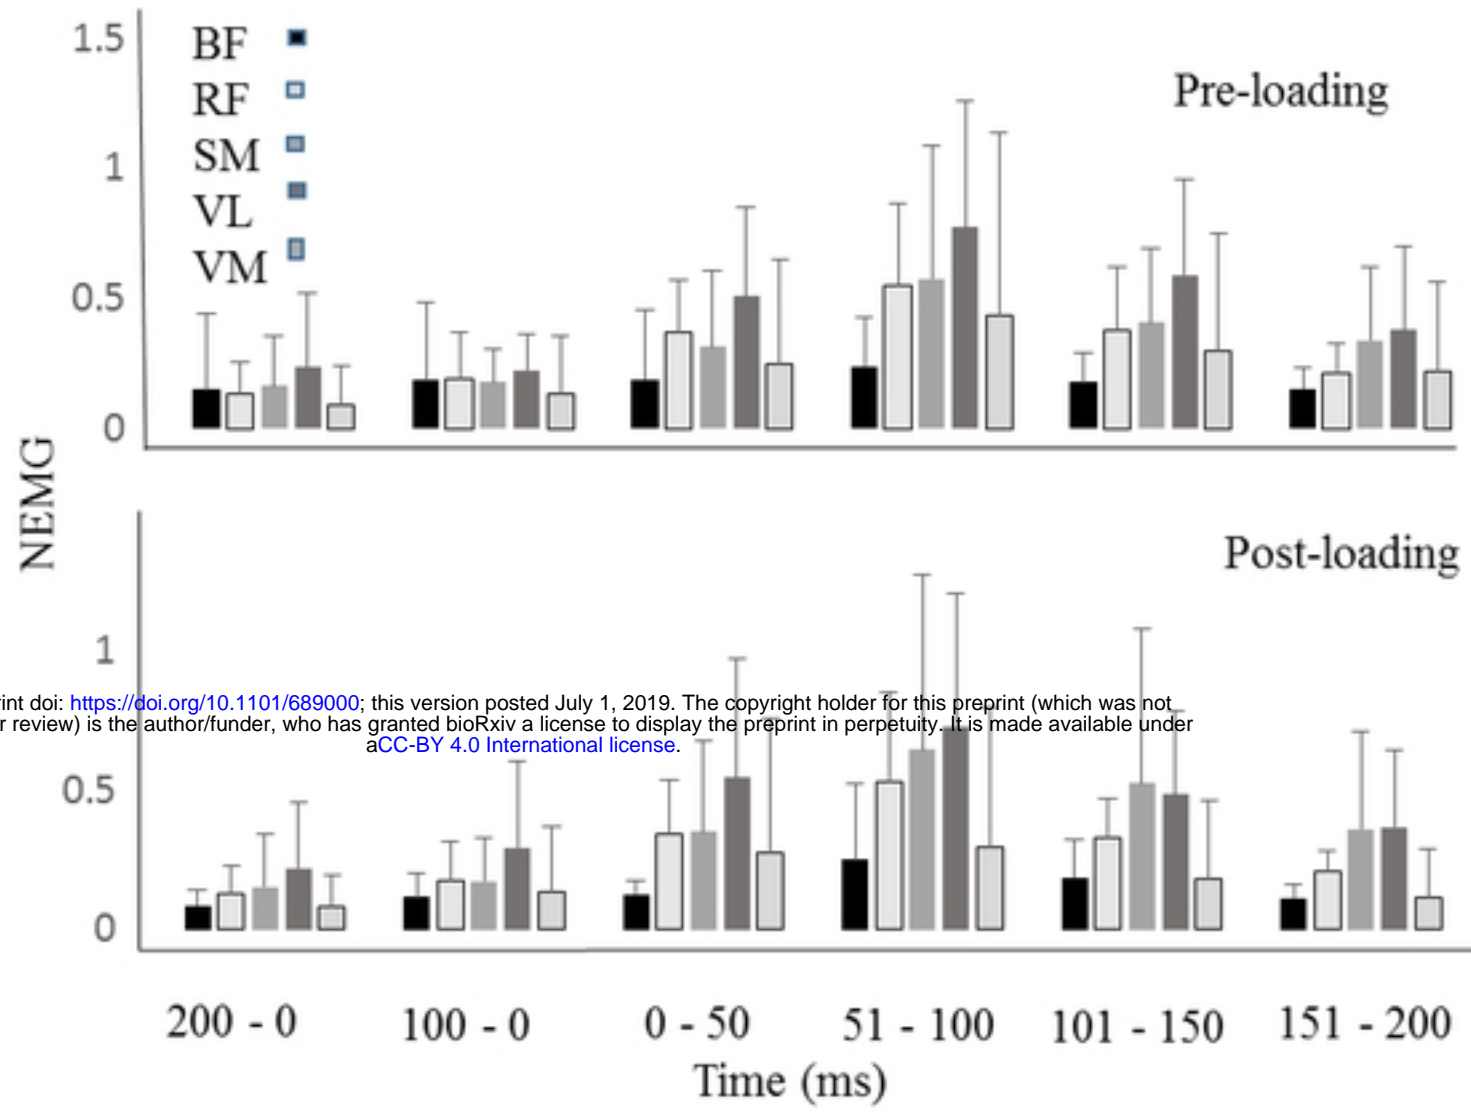

bioRxiv preprint doi: <https://doi.org/10.1101/689000>; this version posted July 1, 2019. The copyright holder for this preprint (which was not certified by peer review) is the author/funder, who has granted bioRxiv a license to display the preprint in perpetuity. It is made available under aCC-BY 4.0 International license.

Figure 1. Mean (sd) normalized EMG from pre and post-landing conditions for rectus femoris (RF), vastus lateralis (VL), vastus medialis (VM), biceps femoris (BF), and semimembranosus (SM) muscle groups. EMG activity is provided in 50ms periods during the first 200ms of landing. Pre-landing ratios are provided 200ms and 100 ms prior to the landing.

bioRxiv preprint doi: <https://doi.org/10.1101/063900>; this version posted July 20, 2019. The copyright holder for this preprint (which was not certified by peer review) is the author/funder, who has granted bioRxiv a license to display the preprint in perpetuity. It is made available under aCC-BY 4.0 International license.

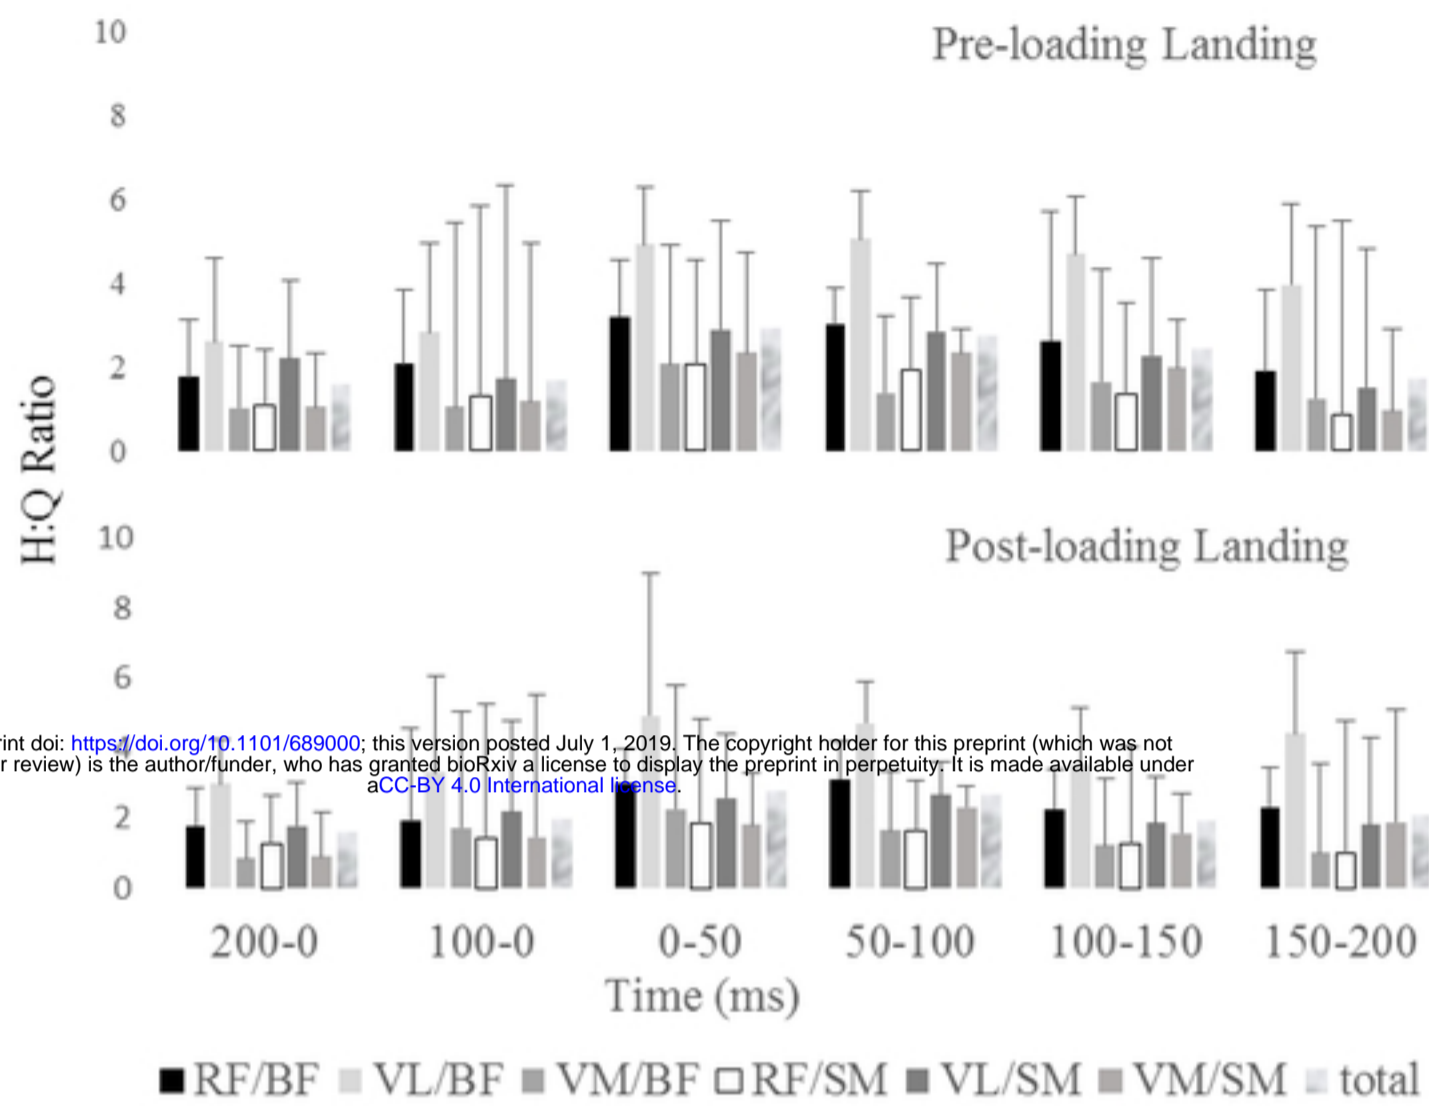

Figure 2. Mean (sd) quadriceps to hamstring ratios from pre and post-landing conditions. Pre-landing ratios are provided 200ms and 100 ms prior to the landing.



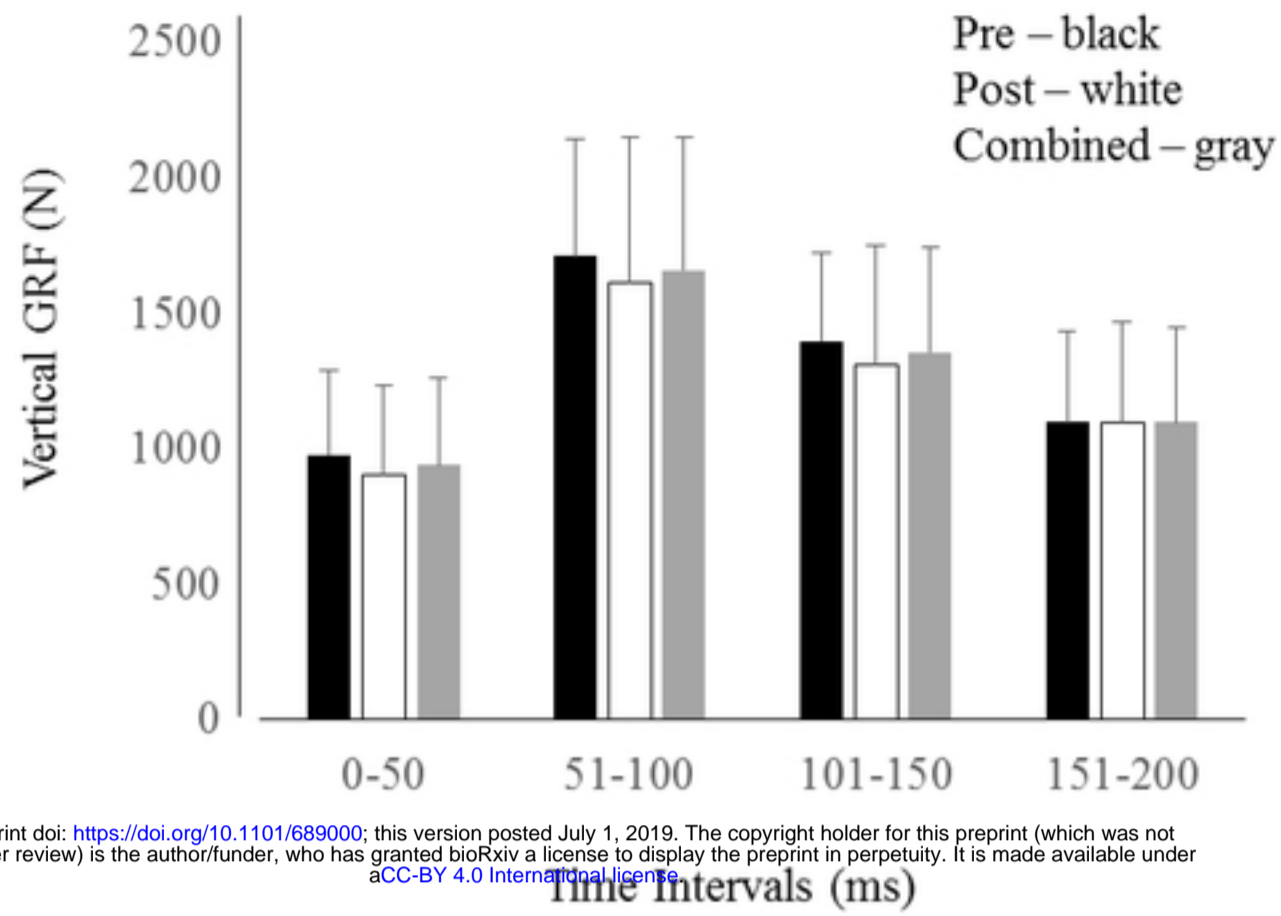

Figure 3. Mean (sd) vertical ground reaction forces measured at 50 ms intervals from initial landing to 200ms during each condition (pre and post).
